## **Genomic prediction accuracies and abilities for growth and wood quality traits of Scots pine, using genotyping-by-sequencing (GBS) data**

Ainhoa Calleja-Rodriguez<sup>\*†</sup>, Jin Pan<sup>†</sup>, Tomas Funda<sup>†‡§</sup>, Zhi-Qiang Chen<sup>†</sup>, John Baisou<sup>†</sup>  
Fikret Isik<sup>\*\*</sup>, Sara Abrahamsson<sup>\*</sup> and Harry X. Wu<sup>†,††,‡‡,1</sup>

<sup>\*</sup> Skogforsk (the Forestry Research Institute of Sweden), Box 3, SE-918 21 Sävar, Sweden.

<sup>†</sup> Umeå Plant Science Centre, Department of Forest Genetics and Plant Physiology, Swedish University of Agricultural Science, SE-901 83 Umeå, Sweden

<sup>‡</sup> Department of Genetics and Breeding, Faculty of Agrobiological and Natural Resources, Czech University of Life Sciences Prague, Kamýcká 129, 165 00 Prague, Czech Republic

<sup>§</sup> Key Laboratory of Forest Genetics and Biotechnology, Nanjing Forestry University, Nanjing, 210037 China

<sup>\*\*</sup> Department of Forestry and Environmental Resources, North Carolina State University, Raleigh, NC 27695, USA.

<sup>††</sup> BAICTBMD, Beijing Forestry University, Beijing, 100083 China

<sup>‡‡</sup> NRCA, CSIRO, Canberra, ACT 2601, Australia

1 Running title: Genomic predictions in Scots pine

2 Keywords: Scots pine, genotyping-by-sequencing, genomic relationship, GBLUP, Bayesian  
3 ridge regression, Bayesian-LASSO

4 <sup>1</sup> Correspondence to: Harry X. Wu, e-mail: [harry.wu@slu.se](mailto:harry.wu@slu.se),

5 Umeå Plant Science Centre, Department of Forest Genetics and Plant Physiology, Swedish  
6 University of Agricultural Science, SE-901 83 Umeå, Sweden.

7

8

9

## ABSTRACT

10 Higher genetic gains can be achieved through genomic selection (GS) by shortening time of  
11 progeny testing in tree breeding programs. Genotyping-by-sequencing (GBS), combined with  
12 two imputation methods, allowed us to perform the current genomic prediction study in Scots  
13 pine (*Pinus sylvestris* L.). 694 individuals representing 183 full-sib families were genotyped  
14 and phenotyped for growth and wood quality traits. 8719 SNPs were used to compare different  
15 genomic prediction models. In addition, the impact on the predictive ability (PA) and prediction  
16 accuracy to estimate genomic breeding values was evaluated by assigning different ratios of  
17 training and validation sets, as well as different subsets of SNP markers. Genomic Best Linear  
18 Unbiased Prediction (GBLUP) and Bayesian Ridge Regression (BRR) combined with  
19 expectation maximization (EM) imputation algorithm showed higher PAs and prediction  
20 accuracies than Bayesian LASSO (BL). A subset of approximately 4000 markers was sufficient  
21 to provide the same PAs and accuracies as the full set of 8719 markers. Furthermore, PAs were  
22 similar for both pedigree- and genomic-based estimations, whereas accuracies and heritabilities  
23 were slightly higher for pedigree-based estimations. However, prediction accuracies of  
24 genomic models were sufficient to achieve a higher selection efficiency per year, varying  
25 between 50-87% compared to the traditional pedigree-based selection.

26

## INTRODUCTION

27 Scots pine (*Pinus sylvestris* L.) is the most widely distributed pine in the world (Houston  
28 Durrant *et al.* 2016; Mátyás *et al.* 2004). It is a highly important commercial species in Europe,  
29 particularly in Northern countries (Krakau *et al.* 2013), being the second foremost species for  
30 wood production in Sweden (The Swedish National Forest Inventory, 2015). The actual Scots  
31 pine breeding program consists of a combination of several selection strategies, all of them  
32 based on conventional progeny testing and breeding value prediction based on reliable  
33 phenotypic assessments, at age of 10-15 years, and pedigree information, thus a breeding cycle  
34 usually takes roughly 21 to 36 years, depending on the testing strategy and mating success  
35 (Rosvall *et al.* 2011).

36

37 Genomic selection (GS) could potentially reduce the breeding cycle, by shortening field test  
38 time through early selections based on GS predictions, and increasing selection intensities with  
39 greater genetic gains per unit of time (Crossa *et al.* 2017; Isik 2014; Grattapaglia *et al.* 2018).  
40 GS was firstly introduced by Meuwissen *et al.* (2001) and it consisted of using genome-wide  
41 marker information to calculate genomic estimated breeding values (GEBV). The major  
42 difference between GS and marker assisted selection (MAS) is that there is no need to detect  
43 quantitative trait loci (QTL) prior to selection. To perform GS, a training set (TS) of individuals  
44 that have been phenotyped and genotyped, generally through single nucleotide polymorphism  
45 markers (SNPs), are used to develop prediction models to estimate GEBV, that are validated  
46 through a validation set (VS) of individuals, or selection candidates, which are genetically  
47 related to the TS and only have marker data for predicting their own breeding values  
48 (Grattapaglia and Resende 2011).

49

50 Next generation sequencing technologies (NGS) have made it possible to discover thousands  
51 of SNPs across the genome and thus make GS a routine application in animal and plant breeding  
52 programs (Grattapaglia *et al.* 2018). SNP arrays had been shown as preferable for their  
53 reproducibility, manageability and storage logistics, as well as their cost efficiency  
54 (Grattapaglia *et al.* 2018). There are still challenges for forest tree species, such as Scots pine,  
55 to develop genome-wide SNP panels or exome probe panels because of their large complex  
56 genomes, and lack of a reference genome. Therefore, it is attractive to employ alternative  
57 genotyping methods such as genotyping-by-sequencing (GBS) (Chen *et al.* 2013; Elshire *et al.*  
58 2011; Dodds *et al.* 2015). GBS uses restriction enzymes to reduce sequencing of complex  
59 genomes and uses a barcoding system for multiplex sequencing, which increases its efficiency  
60 and reduces the genotyping costs (He *et al.* 2014; Pan *et al.* 2015). GBS can generate very large  
61 number of SNPs and produces large amount of missing data. The latter can be solved with the  
62 aid of different imputation methods, such as mean imputation (MI), expectation maximization  
63 (EM), family-based k-nearest neighbor (kNN-Fam) or singular value decomposition (SVD)  
64 (Troyanskaya *et al.* 2001; Dempster *et al.* 1977). EM algorithm was especially designed for  
65 GBS data (Endelman 2011; Poland *et al.* 2012). Genomic predictions based on GBS marker  
66 information have been successfully studied in animal (Gorjanc *et al.* 2015), crop- (Poland *et al.*  
67 2012; Crossa *et al.* 2013; Jarquin *et al.* 2014) and tree breeding (El-Dien *et al.* 2015; El-Dien  
68 *et al.* 2018; Ratcliffe *et al.* 2015).

69

70 Accuracy of GS predictions can vary depending on the model selected. Currently different  
71 statistical methods are available to estimate GEBV. Genomic best linear unbiased prediction  
72 (GBLUP) consists of using the realized relationship matrix (**G** matrix), based on the marker

73 realized kinship relationship, replacing the traditional pedigree numerator relationship matrix  
74 (**A** matrix) which is based on coancestry and the infinitesimal model in quantitative genetics,  
75 assuming that QTL allelic effects are normally distributed and all have a similar contribution  
76 to the genetic variance (Isik *et al.* 2017). On the contrary, most of the Bayesian approaches  
77 presume a prior gamma or exponential distribution of QTL allelic effects, thus the variance at  
78 each locus can vary (Meuwissen *et al.* 2001). For instance, Bayesian LASSO (BL) assumes that  
79 variance follows a Laplace (or double exponential) distribution (Park and Casella 2008).  
80 Nevertheless, Bayesian ridge regression (BRR) assigns QTL effects to a multivariate normal  
81 prior distribution with a common variance, which is modelled hierarchically through a scaled  
82 inverted chi-squared distribution (Perez *et al.* 2010; de los Campos *et al.* 2013; Isik *et al.* 2017).

83  
84 Although Bayesian approaches may seem more appropriate as they can accommodate different  
85 distributions of the allelic effects, the literature on GS in forest trees shows similar results for  
86 all models. For instance, Chen *et al.* (2018a) observed similar prediction accuracies when  
87 comparing four genomic prediction models (GBLUP, BRR, BL and reproducing kernel hilbert  
88 space (RKHS)) in Norway spruce (*Picea abies* (L.)). Isik *et al.* (2016) detected similar predictive  
89 abilities in maritime pine (*Pinus pinaster* Ait.) comparing GBLUP, BRR and BL prediction  
90 models. Although GBLUP and ridge regression BLUP (rrBLUP) were recommended by Tan  
91 *et al.* (2017) for their computational advantages, similar predictive abilities were observed for  
92 GBLUP, rrBLUP, BL and RKHS, in a *Eucalyptus urophylla* and *E. grandis* hybrid study. In an  
93 interior spruce (*Picea engelmannii* × *glauca*) study, Ratcliffe *et al.* (2015) observed similar  
94 accuracies for rrBLUP and BayesC $\pi$ , which in turn performed better than the generalized ridge  
95 regression (GRR), whereas Thistlethwaite *et al.* (2017) observed almost identical predictions  
96 with rrBLUP and GRR in Douglas-fir (*Pseudotsuga menziesii* Mirb. (Franco)). On the

97 contrary, Resende *et al.* (2012b) observed better PA for disease resistance in a loblolly pine  
98 (*Pinus taeda* L.) study with Bayesian methods when compared with BLUP-based methods.  
99 Despite these similar results from different studies carried out so far, it is still important to test  
100 the prediction abilities and accuracies of the different genomic prediction models in different  
101 species and traits, due to the possible differences in the genetic architecture of the traits.

102

103 Among the objective traits of the Scots pine breeding program are: the traditionally existing  
104 growth traits, and the recently incorporated wood quality traits (Rosvall and Mullin 2013). The  
105 goal of this investigation was to study the prediction power of SNP markers for growth and  
106 wood quality traits in Scots pine. The specific objectives were to 1) estimate the predictive  
107 ability and prediction accuracy of genomic estimated breeding values (GEBV), 2) compare the  
108 efficiency of three different genomic prediction models (GBLUP, BL and BRR) in the  
109 estimation of GEBV, 3) study the effect of two different imputation algorithms in the predictive  
110 ability and prediction accuracy of GEBV and 4) compare the effect of different numbers of  
111 SNPs obtained through GBS in the predictive ability and prediction accuracy of the genomic  
112 predictions.

113 MATERIALS AND METHODS

114 **Plant material**

115 In this study a Scots pine full-sib progeny trial (F261, Grundtjärn), belonging to the Swedish  
116 tree improvement program at Skogforsk (the Forestry Research Institute of Sweden) was used.  
117 The trial consists of 184 full-sib families and 7240 trees (F1-generation), generated from a  
118 partial diallel mating design of 40 plus trees (F0-generation) and established in 1971 by  
119 Skogforsk as a randomized single tree plot design, divided into 14 post-blocks (Ericsson 1997).  
120 A more detailed information on the trial can be found in (Fries 2012). 694 progeny trees (F1)  
121 from 183 families were selected for this study, such that the number of trees per family varied  
122 from one to seven with an average of four individuals per family.

123

124 **Phenotypic data and adjustments**

125 Height (Ht) was measured when the trees were 10 (Ht1) and 30 (Ht2) years old. Diameter at  
126 breast height (DBH) was also measured two times, at ages 30 (DBH1) and 36 (DBH2). In 2011,  
127 increment cores at breast height were obtained from 694 trees, and processed by Silviscan  
128 (Innventia AB, Stockholm, Sweden). From the Silviscan analysis, three traits were used in this  
129 study: microfibril angle (MFA), static modulus of elasticity (MOEs) and wood mean density  
130 (DEN). In addition, dynamic modulus of elasticity (MOEd) predicted by Hitman ST300 (Fiber-  
131 gen, Christchurch, New Zealand) was as well used in the current study. All traits were further  
132 described in Hong *et al.* (2014).

133 The following linear mixed model was applied to reduce the impact of environmental effects  
134 for each trait:



135  $\mathbf{Y} = \mathbf{X}\boldsymbol{\beta} + \mathbf{Z}\mathbf{u} + \mathbf{W}\mathbf{b} + \mathbf{e}$ ,

136 where  $\mathbf{Y}$  is the vector of individual tree observations of a single trait,  $\boldsymbol{\beta}$  is the vector of fixed  
137 effects (intercept),  $\mathbf{u}$  is the vector of random effects (post-block and trial design parameters),  $\mathbf{b}$   
138 is a vector of random additive genetic effect of individuals with a normal distribution,  $\mathbf{b} \sim N(0,$   
139  $\mathbf{A}\sigma_b^2)$ ,  $\mathbf{A}$  is a matrix of additive genetic effects among individuals,  $\sigma_b^2$  is the additive genetic  
140 variance and  $\mathbf{e}$  is the vector of residuals.  $\mathbf{X}$ ,  $\mathbf{Z}$  and  $\mathbf{W}$  are the incidence matrices for  $\boldsymbol{\beta}$ ,  $\mathbf{u}$   
141 and  $\mathbf{b}$ , respectively.

142 Adjusted values were obtained for MFA, MOEs, DEN and MOEd, by removing the variation  
143 of the experimental design features and post-block effects. For growth traits (Ht1, Ht2 and  
144 DBH1 and DBH2), spatial adjustments were performed using the row and column coordinates  
145 in the trial. For modeling the residual structure, a model was fitted with only the experimental  
146 design elements as factors (Dutkowski *et al.* 2006). If the spatial distribution of residuals were  
147 non-random for any trait, a second model was fitted, such that the full residual component was  
148 structured as

149  $\mathbf{R} = \sigma_{\xi}^2[\mathbf{AR1}(\rho_{col}) \otimes \mathbf{AR1}(\rho_{row})] + \sigma_{\eta}^2\mathbf{I}$ ,

150 where  $\sigma_{\xi}^2$  and  $\sigma_{\eta}^2$  are spatially dependent and independent residual variances, respectively,  $\otimes$   
151 is the Kronecker product of two matrices, and  $\mathbf{AR1}(\rho_{col})$  and  $\mathbf{AR1}(\rho_{row})$  represent the first-  
152 order autoregressive correlation matrix in the column and row directions, and  $\mathbf{I}$  denotes the  
153 identity matrix (Dutkowski *et al.* 2002; Ivkovic *et al.* 2015; Chen *et al.* 2018b). The adjusted  
154 phenotypic data (predicted values of each tree) were used for genomic predictions.

155

156 **Genotyping**

157 ***DNA extraction***

158 The commercial NucleoSpin® Plant II kit (Machery-Nagel, Düren, Germany) was used to  
159 extract genomic DNA from vegetative buds or needles from the 694 progeny trees and 46  
160 parents. DNA concentration was determined with Qubit® 2.0 fluorometer (Invitrogen,  
161 Carlsbad, CA, USA).

162 ***Genotyping-By-Sequencing (GBS) library preparation***

163 Using 827 samples (replicates included) and *Pst*I high fidelity restriction enzyme (New England  
164 Biolabs, MA, USA), three genomic libraries for GBS were prepared following the procedure  
165 described in Pan *et al.* (2015). The libraries were sequenced on an Illumina HiSeq 2000  
166 platform at SciLifeLab, Sweden.

167 ***SNP calling and filtering***

168 Paired-end raw reads of each GBS library were cleaned and demultiplexed by the  
169 *process\_radtags* module of Stacks v.1.40 (Catchen *et al.* 2011) on the basis of 300 barcodes  
170 with 4–8 bp. Cleaned reads of each sample were aligned to the *Pinus taeda* v1.0 (Wegrzyn *et*  
171 *al.* 2014) reference genome, using BWA mem v0.7.15 (Li and Durbin 2010) with default  
172 parameters. Alignments were coordinate-sorted and indexed using Samtools v1.5 (Li *et al.*  
173 2009). SNP markers were called using the *mpileup* command of Samtools over all the samples  
174 simultaneously, with default parameters, and converted into VCF matrix using BCFtools  
175 v0.1.19 (Narasimhan *et al.* 2016). Furthermore, these variants were sorted to keep only high-  
176 quality SNPs. Using *vcfutils* in BCFtools with default parameters, the SNPs within 3bp around  
177 an indel or with mapping quality < 20 were filtered out; using Vcftools v.0.1.12b (Danecek *et*

178 *al.* 2011), only SNPs with coverage  $\geq 5x$ , genotype quality (GQ)  $\geq 30$ , genotype calling rate >  
179 20% were kept; using the custom Perl program (ReplicateErrfilter.pl), discordant genotypes of  
180 66 replicated samples were detected and the SNP sites with  $\geq 3$  replicate errors were filtered  
181 out. After this step, 24,152 informative SNP markers were retained.

### 182 ***Imputation of missing genotypic data***

183 Missing genotypic data were imputed with TASSEL 5 (Bradbury *et al.* 2007) using LD K-  
184 nearest neighbor (Money *et al.* 2015) as a baseline method. After this imputation, two extra  
185 imputations were performed to compare their prediction accuracies; random (RND) imputation  
186 with the *codeGeno* function in synbreed package (Wimmer *et al.* 2012) in R (R Core Team  
187 2016) and imputation with the expectation maximization (EM) algorithm by the *A.mat* function  
188 implemented in rrBLUP package (Endelman 2011) in R. A total of 15,537 and 15,433 SNPs  
189 with minor allele frequency (MAF) lower than 1% and with a missing data threshold lower than  
190 10% were removed using RND and EM imputation methods, respectively.

191

### 192 **Statistical analysis for genomic predictions**

193 Among all the available approaches to perform genomic predictions we selected genomic best  
194 linear unbiased prediction (GBLUP), Bayesian ridge regression (BRR) and Bayesian LASSO  
195 (BL) regression, to estimate genomic breeding values (GEBV) and to evaluate the ability to  
196 predict them. ABLUP and GBLUP calculations were performed in ASReml 4.1. (Gilmour *et*  
197 *al.* 2015) whereas BRR and BL were implemented using the *BGLR* function from the BGLR  
198 package in R (Perez and de los Campos 2014).

199 **ABLUP and GBLUP**

200 Estimated breeding values (EBV) and GEBV were predicted using the following model

$$201 \quad \mathbf{y} = \mathbf{Xb} + \mathbf{Za} + \mathbf{e} \quad (1)$$

202 where  $\mathbf{y}$  is the vector of the adjusted phenotypic data for each trait,  $\mathbf{b}$  is the vector of fixed  
203 effects (mean),  $\mathbf{a}$  is the vector of random effects and  $\mathbf{e}$  is the vector of residual effects, which is  
204 assumed to follow a normal distribution as  $var(\mathbf{e}) \sim N(0, \mathbf{I}\sigma_e^2)$ , where  $\sigma_e^2$  is the residual variance  
205 and  $\mathbf{I}$  is the identity matrix.  $\mathbf{X}$  and  $\mathbf{Z}$  are the incident matrices of  $\mathbf{b}$  and  $\mathbf{a}$ .

206 ABLUP is the method traditionally used to predict EBV, based on pedigree relationships  
207 between individuals. In ABLUP, the vector  $\mathbf{a}$  (additive genetic effects) from Eq.1 is assumed  
208 to follow a normal distribution with expectations of  $\sim N(0, \mathbf{A}\sigma_a^2)$ , where  $\sigma_a^2$  is the additive  
209 genetic variance and  $\mathbf{A}$  is the additive numerator relationship matrix.

210 GBLUP was performed using Eq.1. This method is derived from ABLUP but differs in that the  
211  $\mathbf{A}$  matrix is now substituted by a genomic relationship matrix, known as realized relationship  
212 matrix ( $\mathbf{G}$  matrix), estimated according to VanRaden (2008).

$$213 \quad \mathbf{G} = \frac{(\mathbf{M}-\mathbf{P})(\mathbf{M}-\mathbf{P})'}{2 \sum_{j=1}^q p_j(1-p_j)}, \quad (2)$$

214 where  $\mathbf{M}$  is the matrix of genotyped samples,  $\mathbf{P}$  is the matrix of allele frequencies with the  $j$ th  
215 column given by  $2(p_j - 0.5)$ , where  $p_j$  is the observed allele frequencies of the genotyped  
216 samples. The elements of  $\mathbf{M}$  were coded as 0, 1 and 2 (i.e., the number of minor alleles) for the  
217 estimation of the  $\mathbf{G}$  matrix with function *kin* from the synbreed package in R in the case of  
218 RND imputed data and with the function *A.mat* from the rrBLUP package in R, for the EM  
219 imputed data. The  $\mathbf{a}$  effects from Eq.1, were assumed to follow a normal distribution with

220 expectations of  $\sim N(0, \mathbf{G}\sigma_g^2)$ , where  $\sigma_g^2$  is the genetic variance explained by the markers effect  
221 and  $\mathbf{G}$  is the realized relationship matrix, in GBLUP (Isik *et al.* 2017).

### 222 ***Bayesian Ridge Regression (BRR)***

223 In BRR, vector  $\mathbf{a}$  from Eq.1 is assigned a multivariate normal prior distribution with a common  
224 variance to all marker effects, that is  $\mathbf{a} \sim N(0, I_p \sigma_m^2)$ , where  $p$  is the number of markers,  $\sigma_m^2$  is  
225 the unknown genetic variance which is contributed by each marker and assigned as  
226  $\sigma_m^2 \sim \chi^{-2}(df_m, S_m)$ , where  $df_m$  is degrees of freedom and  $S_m$  is the scale parameter. Residual  
227 variance is assigned as  $\sigma_e^2 \sim \chi^{-2}(df_e, S_e)$ , with  $df_e$  degrees of freedom and scale parameter for  
228 residual variance  $S_e$  (Perez *et al.* 2010).

### 229 ***Bayesian LASSO (BL) regression***

230 BL method assumes that vector  $\mathbf{a}$  from Eq.1 follows a hierarchical prior distribution with  
231  $\mathbf{a} \sim N(0, \mathbf{T}\sigma_m^2)$ , where  $\mathbf{T} = \text{diag}(\tau_1^2, \dots, \tau_p^2)$ .  $\tau_j^2$  is assigned as  $\tau_j^2 \sim \text{Exp}(\lambda^2)$ ,  $j = 1, \dots, p$ .  $\lambda^2$  is  
232 assigned as  $\lambda^2 \sim \text{Gamma}(r, \delta)$ . Finally, the residual variance is assigned as  $\sigma_e^2 \sim \chi^{-2}(df_e, S_e)$ ,  
233 where  $df_e$  is degrees of freedom and  $S_e$  is the scale parameter for residual variance (Park and  
234 Casella 2008).

### 235 ***Model convergence and prior sensitivity analysis***

236 Bayesian algorithms were extended using Gibbs sampling for estimation of variance  
237 components. The Gibbs sampler was run for 20,000 iterations with a burn-in of 1,000 iterations  
238 and a thinning interval of 100. The convergence of the posterior distribution was verified using  
239 trace plots. Flat priors were given to all models.

240 ***Cross validation, prediction accuracy and predictive ability of the models***

241 We performed 10-fold cross-validation, i.e., 90% of individuals in the training set (TS) and  
242 10% in the validation set (VS), for all traits and models (ABLUP, GBLUP, BRR and BL),  
243 except to test the different sizes of TS and VS. In addition, for each of the genomic prediction  
244 models, two different imputation methods (EM and RND) were evaluated.

245 For the Bayesian methods, GEBV in the validation set (VS) were estimated as,

246 
$$\hat{g}_i = \sum_{j=1}^n Z'_{ij} \hat{a}_j,$$

247 where  $Z'_{ij}$  is the indicator covariate (-1, 0, 1) for the  $i^{\text{th}}$  tree at the  $j^{\text{th}}$  locus and  $\hat{a}_j$  is the estimated  
248 effect at the  $j^{\text{th}}$  locus.

249 Models were evaluated based on their predictive ability (PA) and prediction accuracy  
250 (Accuracy). In our study, PA was defined as the Pearson product-moment correlation between  
251 the cross-validated GEBVs and the adjusted phenotypes ( $y$ ) from Eq. 1, i.e.,  $r(GEBV, y)$  and  
252 Accuracy was defined as the Pearson product-moment correlation between the cross-validated  
253 GEBVs and the EBVs estimated from ABLUP using all adjusted phenotypes, i.e.,  
254  $r(GEBV, EBV)$ .

255 ***Effect of the relative size on training and validation sets***

256 The effect on the PA and prediction accuracy, of five different size ratio of TS and VS, was  
257 evaluated. The relative size of TS and VS were established dividing the 694 individuals in five  
258 different proportions of TS/VS. That is 90%, 80%, 70%, 60% and 50% for TS and the rest as  
259 VS. For each trait and each of the 20 models, 10 replicates were performed.

260 ***Effect of marker number on accuracies***

261 Due to the better predictions obtained with the BRR-EM model from cross-validation results,  
262 BRR-EM model was selected to test the effect of the number of SNPs on the PA and prediction  
263 accuracy. From all available SNPs, we randomly selected 14 sets of SNPs.

264 ***Heritability estimation***

265 Pedigree-based narrow sense-heritability ( $h_a^2$ ) and genomic narrow-sense heritability ( $h_g^2$ )  
266 were estimated as

267 
$$h_a^2 = \frac{\sigma_a^2}{\sigma_{pa}^2} \text{ and } h_g^2 = \frac{\sigma_g^2}{\sigma_{pg}^2}$$

268 where  $\sigma_a^2$  and  $\sigma_g^2$  are the pedigree- and genomic-based additive genetic variances and  $\sigma_{pa}^2$  and  
269  $\sigma_{pg}^2$  are phenotypic variances estimated using ABLUP and GBLUP, respectively.

270 ***Relative selection efficiency of GS***

271 Assuming that selection response is inversely proportional to the length of the breeding cycle  
272 (Grattapaglia and Resende 2011), the relative efficiency (*RE*) of GS to the traditional pedigree-  
273 based selection (TPS) can be estimated as

274 
$$RE = \frac{r(GEBV_{GS}, EBV)}{r(EBV_{TPS}, EBV)},$$

275 consequently the *RE* per year (*RE/year*) can be estimated as

276 
$$RE/year = \frac{r(GEBV_{GS}, EBV)}{r(EBV_{TPS}, EBV)} \times \frac{CL_{TPS}}{CL_{GS}},$$

277 where  $CL_{TPS}$  and  $CL_{GS}$  are the breeding cycle lengths of TPS and GS, respectively.

278 In order to estimate *RE*, we assumed that with GS approaches the cycle could be reduced by  
279 50%.

280

281 **Data availability**

282 The data sets used in this study are available as File S1 and File S2, in the supplementary  
283 material for Calleja-Rodriguez et al. 2019 ([link figshare here](#)).



284

## RESULTS

285 **Prediction accuracy and predictive ability of the different models**

286 PAs and prediction accuracies from the 10-fold cross-validation were obtained for each  
287 model (ABLUP, GBLUP, BRR and BL) and imputation method (Table 1). ABLUP  
288 performed best in terms of prediction accuracy. Among the genomic prediction models,  
289 different models produced higher accuracies for various traits. There was no single  
290 genomic prediction model that fit to all the traits best. In the case of PAs, ABLUP did not  
291 showed the highest PA for almost any of the traits. Depending on the trait, the superiority  
292 of the models varied for PAs. ABLUP showed higher PA for DEN (0.41); however, it was  
293 only slightly higher than PAs obtained with most other models (0.40 in all cases).

294 In summary, although the best accuracies were observed with ABLUP for all traits,  
295 genomic prediction models produced higher PAs for all traits. Moreover, all the genomic  
296 prediction models showed similar PAs and prediction accuracies for all traits, being slightly  
297 higher when EM imputation method was combined with GBLUP, BRR or BL.

298 **Relative size effect of the training and validation sets**

299 To test the size effect of different ratios of TS and VS, EM imputation method was used,  
300 in combination with ABLUP, GBLUP and BRR since it showed the best PAs and  
301 accuracies in our previous 10-fold cross validation.

302 All three models showed a similar but increasing patterns of PA for different traits with the  
303 increase of TS percentages (Fig. 1A). GBLUP and ABLUP showed the highest PAs for

304 almost all traits, when 70% of the individuals were assigned to the TS; however, BRR  
305 needed a higher percentage of individuals assigned to the TS to reach the highest PA.

306 Among the three methods, ABLUP had the best prediction accuracies for all eight traits  
307 under all TS ratios (Fig. 1B). BRR and GBLUP showed similar accuracies. To reach the  
308 highest prediction accuracies, 80-90% of individuals in the TS were needed for all traits  
309 for BRR method, whereas GBLUP needed a subsample of 70% or 80% individuals as TS  
310 for almost all traits. The computational time needed to perform the analysis as the subset  
311 of individuals increased, was substantially longer with Bayesian models.

312 In brief, the sensitivity analysis suggested that using about 70-80% of individuals sampled  
313 from the studied population would produce similar PA and accuracy as the full sample size,  
314 for the growth and wood quality traits.

### 315 **Effect of increasing number of marker on accuracies**

316 The impact of the different subsets of SNPs was tested based on BRR-EM model that was  
317 the model with higher PA and accuracy from the previous 10-fold cross-validation.  
318 Accuracies and PAs increased for all traits as the number of SNPs increased (Fig. 2).  
319 However, for almost all traits, the greatest increase on prediction accuracy was attained  
320 when the subset of markers was 1000 SNPs. Accuracy continued slightly increasing, for  
321 all traits with subsets of SNPs higher than 1K, but the increase slowed after 3K – 4K SNPs,  
322 reaching the maximum accuracies at 3K for DBH1, 4K for Ht1 and MOEs, 7K for DEN  
323 and MOEd, and 8K for Ht2, DBH2 and MFA.

324 PA followed a similar pattern; however, it decreased at a subset of 2K SNPs for Ht1, Ht2  
325 and DBH1 to continue increasing until a subset of 3K SNPs where it stagnated until it  
326 reached the maximum of 8719 SNPs. For DBH2, PA decreased at a subset of 4K SNPs and  
327 kept constant for the following subset of SNPs. The PA of wood traits showed an increase  
328 trend as the number of SNPs rise up, until they reach a plateau at around a subset of SNPs  
329 that vary from 4K to 6K depending on the trait. In short, from the subset of 3K-4K SNPs  
330 we did not detect any considerable increase in the accuracies and PA of any of the traits  
331 except MFA and MOEs for which we detected an increase at the subset of 2K SNPs that  
332 kept more or less constant until the final subset of 8719 SNPs.

### 333 **Heritabilities**

334 Narrow sense heritabilities estimates based on ABLUP were higher than those based on  
335 GBLUP, except for DBH2 which was higher for GBLUP (Table 2). MOEs showed the  
336 same heritability both for ABLUP and GBLUP-EM. GBLUP heritability estimates  
337 calculated from the realized relationship matrix derived from EM imputation method were  
338 higher than those derived from the RND imputation method, for almost all traits, except  
339 Ht1 and MOEd. Standard errors were similar for growth traits regardless the BLUP method  
340 used but they were always lower when derived from GBLUP method. Based on GBLUP,  
341 we observed that traits with heritability estimates equal or lower than 0.25, such as, Ht1,  
342 DBH1, DBH2 or MFA, showed estimates of PA below 0.30, while those with heritabilities  
343 of approximately 0.40 (Ht2, MOEs, DEN and MOEd) had PA estimations of about 0.40.  
344 Moreover, we detected positive linear correlation between PA and trait heritabilities  
345 ( $r=0.99$ ,  $p<0.0001$ ), but not between accuracies and heritabilities ( $r=0.22$ ,  $p=0.6$ ) (Fig. 3).

### 346 **Relative selection efficiency of GS**

347 The relative genomic selection efficiency (RE) and relative genomic selection efficiency  
348 per year (RE/year) were estimated in the genomic selection models, using three models  
349 (GBLUP, BRR and BL) and the EM imputation. The Swedish Scots pine breeding cycle  
350 combines several selection strategies and we divided in two groups, according to their  
351 lengths (Rosvall *et al.* 2011). For the first group of strategies, which is basically seedling  
352 backward selection, the cycle length takes up to 36 years. For such strategies, flowering  
353 time needs to be included in the cycle length. In order to estimate RE, we assumed that  
354 with GS approaches the cycle could be reduced by 50% to 18 years, since 15 years is the  
355 starting age for female flowering in Scots pine (Mátyás *et al.* 2004). The cycle length for  
356 the second group of strategies (forward selection and open-pollinated backward selection)  
357 takes about 21 years and we assumed to shorten this breeding cycle, by 50% as well (11  
358 years) by reducing progeny testing. Both RE and RE/year for both groups of strategies,  
359 were estimated.

360 The RE/year increased for all traits and models when reducing the breeding cycle by 50%  
361 (Table 3). Among the genomic prediction models, highest RE/year were obtained for  
362 GBLUP and BRR, which in addition, were slightly higher for the first group of selection  
363 strategies than for the second one. The first group of strategies showed RE/year that varied  
364 between 66-85% with GBLUP, 57-90% with BRR, and 59-83% with BL, depending on  
365 the trait. Within the second group of selection strategies we observed that the RE/year  
366 ranged between 59-77% for GBLUP, 50-81% for BRR and 52-75% for BL, again

367 depending on the trait. In summary, for all traits and genomic prediction models, RE/year  
368 exceeded 50% when the breeding cycle was reduced by 50%.

369

## DISCUSSION

370 After the genomic selection (GS) concept was proposed in 2001 (Meuwissen et al 2001),  
371 genomic prediction studies were initially implemented in dairy cattle. The technology was  
372 adopted in crop and tree breeding in the last decade. The execution of GS in animal and  
373 crop breeding programs, such as dairy cattle, oat, maize and wheat, increased genetic gains  
374 (Meuwissen *et al.* 2016; Crossa *et al.* 2017). Implementation of GS in tree breeding is  
375 underway with recent publications in eucalypts (Tan et al 2017), white spruce (Beaulieu et  
376 al 2014), black spruce (Lenz et al 2017), interior spruce (Ratcliffe et al. 2015), Norway  
377 spruce (Chen et al 2018a), loblolly (Resende et al 2012a, 2012b) and maritime pine (Isik  
378 et al 2016). However, genomic prediction studies and new genotyping platforms still need  
379 to be developed for many species (Grattapaglia *et al.* 2018). To our knowledge, this is the  
380 first genomic prediction study performed in Scots pine.

**381 Marker imputation for GBS data**

382 For species such as Scots pine, with large and complex genomes (Neale and Kremer 2011)  
383 but without a reference genome, and with no SNP chips or exome panels developed,  
384 genotyping-by-sequencing (GBS) method is considered as an attractive alternative to  
385 perform GS or GWAS studies. When using GBS data, large amounts of missing data are  
386 produced, thus filtering and imputation SNPs are critical steps (Dodds *et al.* 2015). In an  
387 interior spruce genomic prediction study with GBS data, El-Dien *et al.* (2015) observed  
388 that the imputation method used had influence in the quality of predictions and concluded  
389 that EM and kNN-Fam imputation methods, provided the highest genomic prediction

390 accuracies. EM was as well the most accurate imputation method in a wheat breeding GS  
391 study (Poland *et al.* 2012) with GBS data. Our study support those findings, since among  
392 our genomic prediction models we observed more accurate predictions when EM  
393 imputation algorithm was used instead of RND imputation, regardless of the genomic  
394 prediction model used.

### 395 **Accuracy and predictive ability of GS prediction**

396 Traits of interest in tree breeding programs have different genetic architecture; thus,  
397 different genomic prediction models to evaluate PA and prediction accuracy must still be  
398 studied. Isik *et al.* (2016) observed similar PAs for GBLUP, BRR and BL for growth and  
399 stem straightness traits in a two generations genomic prediction study, in maritime pine;  
400 however, they found larger bias when BL was used. In a another study with three  
401 generations of maritime pine larger bias was detected for ABLUP than for GBLUP or BL  
402 (Bartholome *et al.* 2016). Several statistical methods, namely, GBLUP, BRR, BL and  
403 reproducing kernel Hilbert space (RKHS), were compared in a Norway spruce study (Chen  
404 *et al.* 2018a) where similar prediction accuracies were observed for all of them. rrBLUP,  
405 GRR and BayesC $\pi$  predictions were compared for interior spruce (Ratcliffe *et al.* 2015),  
406 concluding that all methods had similar accuracies although slightly lower for GRR.  
407 Congruent with those studies we observed that for wood and growth traits in Scots pine,  
408 largest accuracies were obtained with ABLUP for all traits, whereas GBLUP, BL and BRR  
409 had similar PAs and accuracies. For instance, accuracies reported in Douglas fir  
410 (Thistlethwaite *et al.* 2017), were very similar for height at early age (0.87-0.91) and  
411 mature age (0.80 – 0.89), as well as for density (0.94 – 0.96), regardless of the genomic

412 prediction model used, whereas in *Eucalyptus nitents* (Suontama *et al.* 2018), prediction  
413 accuracies reported for density (0.74 – 0.79), diameter (0.29 – 0.51) and height (0.29 –  
414 0.51) were slightly lower. Our accuracy estimations for MFA and MOE are similar to those  
415 reported for MFA in white spruce (0.71) and MOE in Norway spruce (0.70-0.76), by  
416 Beaulieu *et al.* (2014) and Chen *et al.* (2018a), respectively. In addition, PAs for Ht, DBH,  
417 MFA and MOE were similar to those reported in Norway spruce, black spruce (*Picea*  
418 *mariana*) or eucalyptus hybrids (Tan *et al.* 2017; Chen *et al.* 2018a; Lenz *et al.* 2017).  
419 However, they were slightly lower than those reported for diameter and height in maritime  
420 pine (Isik *et al.* 2016).

#### 421 **Effects of the training and validation set sizes**

422 Our results differed from previous studies which stated that predictive ability and  
423 prediction accuracy increased as the size of the training set increased. For instance, Tan *et*  
424 *al.* (2017) detected that PA increased as the TS size increased without reaching any plateau  
425 for all models and traits evaluated in *Eucalyptus* hybrids. Similarly, Lenz *et al.* (2017)  
426 asserted that accuracy increased as the TS size increased, however after assigning TS of  
427 45% individuals or more, the accuracy increase was not as important. Nevertheless, we  
428 found some similarities between other studies, in which the accuracy increased as the TS  
429 size increased but reaching a plateau for height when TS reached 80% of individuals and  
430 75% of individuals for wood quality traits (Chen *et al.* 2018a). In the current study, the  
431 highest PA and accuracy was obtained when TS size was between 70-80% of the trees,  
432 depending on the trait. From those studies, we know, as well, that the number of trees per



433 family have an effect on the GS efficiency; however, we could observe the advantage of  
434 applying GS prediction methods, even when the number of trees per family were low.

#### 435 **Marker number effects**

436 In a general conifer breeding program simulation study, Li and Dungey (2018) detected an  
437 increase in the accuracy of GEBV for traits with low and high heritability when the subset  
438 of SNPs increased from 7K to 90K, for a training population with 1000 clones from five  
439 simulated generations. Moreover, the same pattern was observed in Norway spruce (Chen  
440 *et al.* 2018a), where the accuracy increased with number of markers reaching a plateau  
441 between 4K and 8K markers. On the contrary, for black spruce, Lenz *et al.* (2017) did not  
442 find an remarkable decrease in prediction accuracies when markers were reduced randomly  
443 from 5K to 1K; nonetheless, when markers were further reduced to 500, the accuracy  
444 decreased dramatically. Tan *et al.* (2017) noted a greater impact of the number of SNPs  
445 than their genomic location in the predictive ability, for both GBLUP and RKHS. In the  
446 same study, they also observed a stronger reduction in the PA when the subset of SNPs  
447 dropped below 5K, and that traits with lower heritabilities were more sensitive to the  
448 reduction in the number of SNPs.

449 The results in this study are in accordance with previous studies (Tan *et al.* 2017; Lorenz  
450 *et al.* 2011; Chen *et al.* 2018a) that GBLUP is preferable for large SNP markers datasets,  
451 since the Bayesian approaches are computationally demanding, as long as there are no  
452 major QTL effects in the study. In the current study 3K to 4K SNP were required to reach  
453 a similar efficiency to that achieved when using all 8719 SNPs.

**454 Heritabilities**

455 Bartholome *et al.* (2016) stated that no clear pattern was detected between accuracy and  
456 heritability estimates for maritime pine. Additionally, Grattapaglia and Resende (2011) and  
457 Chen *et al.* (2018a) observed that heritability impact on prediction accuracies is relatively  
458 insignificant, therefore the former authors recommended that larger training sets should  
459 be used for traits with lower heritabilities. Whereas no trend was detected among prediction  
460 accuracies and trait heritabilities, we noted a positive linear trend among PA and  
461 heritabilities, i.e., traits with lower heritabilities (below 0.25) exhibited the lowest PA while  
462 higher PA were detected for traits with moderate heritabilities (above 0.30). This is  
463 congruent with the positive correlation between trait heritabilities and PA indicated by  
464 Resende *et al.* (2012b) in loblolly pine, that showed a positive trend between trait  
465 heritabilities and PA. Similarly, traits with low heritabilities had lower predictive ability in  
466 a maritime pine study (Isik *et al.* 2016). Chen *et al.* (2018a) in their Norway spruce study  
467 concluded that narrow-sense heritability was more similar to PA than to prediction  
468 accuracy, as PA involves both phenotypic and genetic values.

**469 Relative selection efficiency**

470 A simulation study conducted by Grattapaglia and Resende (2011) showed that when the  
471 breeding cycle length was reduced by 50%, the RE/year doubled, and that when the cycle  
472 length was reduced by 75% the RE/year reached 3 folds at high marker levels. This theory  
473 was confirmed by Resende *et al.* (2012a) that by reducing 50% the loblolly pine breeding  
474 cycle, obtained an increase in the RE/year between 53-92% for DBH and 58-112% for Ht,  
475 compared to the traditional pedigree-based selection. Similarly RE varied between 106%

476 to 139% for Ht when the breeding cycle length of interior spruce was reduced by 25%  
477 (Ratcliffe *et al.* 2015). In Norway spruce, the RE/year of MOE increased between 69 –  
478 83% when the cycle length was also shortened by 50% (Chen *et al.* 2018a). Our results  
479 exhibited the same pattern for growth and wood quality traits, with a RE/year ranging  
480 between 50 – 90%, with a reduction of the cycle length of 50%.

481

482

## CONCLUSIONS

483 Our results provides an initial perspective of the use of genomic prediction in Scots pine  
484 and are encouraging to develop GS strategies for the species. Similar predictive abilities  
485 and accuracies among all genomic prediction models were observed, suggesting that the  
486 traits are under additive genetic control. Due to both the computational and predictive  
487 efficiency, GBLUP was the most effective method to perform genomic predictions for both  
488 growth and wood quality traits in Scots pine. The main advantage of GS in Scots pine is  
489 the possibility of reducing of the breeding cycle. Our study showed that GS could  
490 potentially reduce the breeding cycle by half, and under that assumption, the relative  
491 genomic selection efficiency could be as high as 90% depending on the selection strategy  
492 and the trait.

493 The results presented here are based on a relatively small population with a shallow  
494 pedigree. More studies using different populations, preferably populations with deeper  
495 pedigrees should be carried out to better understand the predictive power of SNP markers  
496 for traits with complex inheritance patterns in the species. The predictive power of SNP  
497 markers should be tested over two generations as suggested by Isik (2014) because the

498 marker-QTL phase is expected to change once the population undergoes through breeding,  
499 due to recombination of homologue chromosomes during the meiosis.

500

## ACKNOWLEDGEMENTS

501 We thank to Anders Fries, David Hall, Hong Zhou, Amaryllis Vidalis and René Fernández  
502 Uría for field sampling, phenotyping and helping with DNA extractions, Ruiqi Pian for  
503 helping with the GBS library preparation. This work was partially funded by Formas (grant  
504 number 2014-00171), and also by the Knut and Alice Wallenberg Foundation, and  
505 Sweden's innovation agency Vinnova, through their financial support of the 2<sup>nd</sup> Research  
506 School in Forest Genetics, Biotechnology and Breeding.

507

508

## REFERENCES

- 509 Bartholome, J., J. Van Heerwaarden, F. Isik, C. Boury, M. Vidal *et al.*, 2016 Performance  
510 of genomic prediction within and across generations in maritime pine. BMC  
511 Genomics 17: 604. <https://doi.org/10.1186/s12864-016-2879-8>
- 512 Beaulieu, J., T. K. Doerksen, J. MacKay, A. Rainville, and J. Bousquet, 2014 Genomic  
513 selection accuracies within and between environments and small breeding groups  
514 in white spruce. BMC Genomics 15: 1048. [https://doi.org/10.1186/1471-2164-15-](https://doi.org/10.1186/1471-2164-15-1048)  
515 1048
- 516 Bradbury, P. J., Z. Zhang, D. E. Kroon, T. M. Casstevens, Y. Ramdoss *et al.*, 2007  
517 TASSEL: software for association mapping of complex traits in diverse samples.  
518 Bioinformatics 23:2633-2635. <https://doi.org/10.1093/bioinformatics/btm308>
- 519 Catchen, J. M., A. Amores, P. Hohenlohe, W. Cresko, and J. H. Postlethwait, 2011 Stacks:  
520 building and genotyping loci de novo from short-read sequences. G3(Bethesda)  
521 1:171-182. <https://doi.org/10.1534/g3.111.000240>
- 522 Chen, C., S. E. Mitchell, R. J. Elshire, E. S. Buckler, and Y. A. El-Kassaby, 2013 Mining  
523 conifers' mega-genome using rapid and efficient multiplexed high-throughput  
524 genotyping-by-sequencing (GBS) SNP discovery platform. Tree Genet. Genomes  
525 9:1537-1544. <https://doi.org/10.1007/s11295-013-0657-1>
- 526 Chen, Z.Q., J. Baisou, J. Pan, B. Karlsson, B. Andersson *et al.*, 2018a Accuracy of genomic  
527 selection for growth and wood quality traits in two control-pollinated progeny trials

- 528 using exome capture as the genotyping platform in Norway spruce. *BMC Genomics*  
529 19: 946. <https://doi.org/10.1186/s12864-018-5256-y>
- 530 Chen, Z.Q., A. Helmersson, J. Westin, B. Karlsson, and H. X. Wu, 2018b Efficiency of  
531 using spatial analysis for Norway spruce progeny tests in Sweden. *Ann. Forest. Sci.*  
532 75: 2. <https://doi.org/10.1007/s13595-017-0680-8>
- 533 Crossa, J., Y. Beyene, S. Kassa, P. Perez, J. M. Hickey *et al.*, 2013 Genomic prediction in  
534 maize breeding populations with genotyping-by-sequencing. *G3(Bethesda)* 3:  
535 1903-1926. <https://doi.org/10.1534/g3.113.008227>
- 536 Crossa, J., P. Perez-Rodriguez, J. Cuevas, O. Montesinos-Lopez, D. Jarquin *et al.*, 2017  
537 Genomic selection in plant breeding: methods, models, and perspectives. *Trends*  
538 *Plant Sci.* 22: 961-975. <https://doi.org/10.1016/j.tplants.2017.08.011>
- 539 Danecek, P., A. Auton, G. Abecasis, C. A. Albers, E. Banks *et al.*, 2011 The variant call  
540 format and VCFtools. *Bioinformatics* 27: 2156-2158.  
541 <https://doi.org/10.1093/bioinformatics/btr330>
- 542 de los Campos, G., J.M. Hickey, R. Pong-Wong, H. D. Daetwyler, and M. P. L. Calus,  
543 2013 Whole-genome regression and prediction methods applied to plant and animal  
544 breeding. *Genetics* 193: 327-345. <https://doi.org/10.1534/genetics.112.143313>
- 545 Dempster, A. P., N. M. Laird, and D. B. Rubin, 1977 Maximum likelihood from incomplete  
546 data via EM algorithm. *J. Roy. Stat. Soc. B. Met.* 39:1-22.

- 547 Dodds, K. G., J. C. McEwan, R. Brauning, R. M. Anderson, T. C. van Stijn *et al.*, 2015  
548 Construction of relatedness matrices using genotyping-by-sequencing data. *BMC*  
549 *Genomics* 16: 1047. <https://doi.org/10.1186/s12864-015-2252-3>
- 550 Dutkowski, G. W., J. C. E. Silva, A. R. Gilmour, and G. A. Lopez, 2002 Spatial analysis  
551 methods for forest genetic trials. *Can. J. Forest. Res.* 32: 2201-2214.  
552 <https://doi.org/10.1139/X02-111>
- 553 Dutkowski, G. W., J. C. E. Silva, A. R. Gilmour, H. Wellendorf, and A. Aguiar, 2006  
554 Spatial analysis enhances modelling of a wide variety of traits in forest genetic  
555 trials. *Can. J. Forest. Res.* 36: 1851-1870. <https://doi.org/10.1139/x06-059>
- 556 El-Dien, O. G., B. Ratcliffe, J. Klapste, C. Chen, I. Porth *et al.*, 2015 Prediction accuracies  
557 for growth and wood attributes of interior spruce in space using genotyping-by-  
558 sequencing. *BMC Genomics* 16: 370. <https://doi.org/10.1186/s12864-015-1597-y>
- 559 El-Dien, O. G., B. Ratcliffe, J. Klapste, I. Porth, C. Chen *et al.*, 2018 Multienvironment  
560 genomic variance decomposition analysis of open-pollinated interior spruce (*Picea*  
561 *glauca* x *engelmannii*). *Mol. Breeding* 38: 26. [https://doi.org/10.1007/s11032-018-](https://doi.org/10.1007/s11032-018-0784-3)  
562 [0784-3](https://doi.org/10.1007/s11032-018-0784-3)
- 563 Elshire, R. J., J. C. Glaubitz, Q. Sun, J. A. Poland, K. Kawamoto *et al.*, 2011 A robust,  
564 simple genotyping-by-sequencing (GBS) approach for high diversity species. *PLoS*  
565 *ONE* 6: e19379. <https://doi.org/10.1371/journal.pone.0019379>



- 566 Endelman, J. B., 2011 Ridge regression and other kernels for genomic selection with R  
567 package rrBLUP. *Plant Genome* J. 4: 250-255.  
568 <https://doi.org/10.3835/plantgenome2011.08.0024>
- 569 Ericsson, T., 1997 Enhanced heritabilities and best linear unbiased predictors through  
570 appropriate blocking of progeny trials. *Can. J. Forest. Res.* 27: 2097-2101.  
571 <https://doi.org/10.1139/cjfr-27-12-2097>
- 572 Fries, A., 2012 Genetic parameters, genetic gain and correlated responses in growth, fibre  
573 dimensions and wood density in a Scots pine breeding population. *Ann. Forest. Sci.*  
574 69: 783-794. <https://doi.org/10.1007/s13595-012-0202-7>
- 575 Gilmour, A., B. J. Gogel, B. R. Cullis, S. J. Welham, and R. Thompson, 2015 ASReml  
576 User Guide Release 4.1 Structural Specification. Hemel Hempstead:VSN  
577 International Ltd, Hemmel Hempstead, UK.
- 578 Gorjanc, G., M. A. Cleveland, R. D. Houston, and J. M. Hickey, 2015 Potential of  
579 genotyping-by-sequencing for genomic selection in livestock populations. *Genet.*  
580 *Sel. Evol.* 47: 12. <https://doi.org/10.1186/s12711-015-0102-z>
- 581 Grattapaglia, D., and M. D. V. Resende, 2011 Genomic selection in forest tree breeding.  
582 *Tree Genet. Genomes* 7: 241-255. <https://doi.org/10.1007/s11295-010-0328-4>
- 583 Grattapaglia, D., O. B. Silva-Junior, R. T. Resende, E. P. Cappa, B.S.F. Müller *et al.*, 2018  
584 Quantitative genetics and genomics converge to accelerate forest tree breeding.  
585 *Front. Plant. Sci.* 9. <https://doi.org/10.3389/fpls.2018.01693>

- 586 He, J., X. Zhao, A. Laroche, Z. X. Lu, H. Liu *et al.*, 2014 Genotyping-by-sequencing  
587 (GBS), an ultimate marker-assisted selection (MAS) tool to accelerate plant  
588 breeding. *Front. Plant. Sci.* 5: 484. <https://doi.org/10.3389/fpls.2014.00484>
- 589 Hong, Z., A. Fries, and H. X. Wu, 2014 High negative genetic correlations between growth  
590 traits and wood properties suggest incorporating multiple traits selection including  
591 economic weights for the future Scots pine breeding programs. *Ann. Forest. Sci.*  
592 71: 463-472. <https://doi.org/10.1007/s13595-014-0359-3>
- 593 Houston Durrant, T., D. de Rigo, and G. Caudullo, 2016. *Pinus sylvestris* in Europe:  
594 distribution, habitat, usage and threats. pp. e016b94+ in: *European Atlas of Forest*  
595 *Tree Species*, edited by J. San-Miguel-Ayanz, D. de Rigo, G. Caudullo, T. Houtston  
596 Durrant, and A. Mauri. Publ. Off. EU, Luxembourg.
- 597 Isik, F., 2014 Genomic selection in forest tree breeding: the concept and an outlook to the  
598 future. *New Forest* 45 (3):379-401. [10.1007/s11056-014-9422-z](https://doi.org/10.1007/s11056-014-9422-z)
- 599 Isik, F., J. Bartholome, A. Farjat, E. Chancerel, A. Raffin *et al.*, 2016 Genomic selection  
600 in maritime pine. *Plant Sci.* 242:108-119.  
601 <https://doi.org/10.1016/j.plantsci.2015.08.006>
- 602 Isik, F., J. Holland, and C. Maltecca, 2017 *Genetic Data Analysis for Plant and Animal*  
603 *Breeding*. Springer International Publishing, New York.
- 604 Ivkovic, M., W. Gapare, H. X. Yang, G. Dutkowski, P. Buxton *et al.*, 2015 Pattern of  
605 genotype by environment interaction for radiata pine in southern Australia. *Ann.*  
606 *Forest. Sci.* 72: 391-401. <https://doi.org/10.1007/s13595-014-0437-6>

- 607 Jarquin, D., K. Kocak, L. Posadas, K. Hyma, J. Jedlicka *et al.*, 2014 Genotyping by  
608 sequencing for genomic prediction in a soybean breeding population. BMC  
609 Genomics 15: 740. <https://doi.org/10.1186/1471-2164-15-740>
- 610 Krakau, U. K., M. Liesebach, T. Aronen, M. A. Lelu-Walter, and V. Schneck, 2013 Scots  
611 pine (*Pinus sylvestris* L.), pp. 267-323 in *Forest Tree Breeding in Europe*, edited  
612 by L.E Pâques. Dordrecht: Springer Science + Business Media.
- 613 Lenz, P. R. N., J. Beaulieu, S. D. Mansfield, S. Clement, M. Despouts *et al.*, 2017 Factors  
614 affecting the accuracy of genomic selection for growth and wood quality traits in  
615 an advanced-breeding population of black spruce (*Picea mariana*). BMC Genomics  
616 18: 335. <https://doi.org/10.1186/s12864-017-3715-5>
- 617 Li, H., and R. Durbin, 2010 Fast and accurate long-read alignment with Burrows-Wheeler  
618 transform. *Bioinformatics* 26: 589-595.  
619 <https://doi.org/10.1093/bioinformatics/btp698>
- 620 Li, H., B. Handsaker, A. Wysoker, T. Fennell, J. Ruan *et al.*, 2009 The sequence  
621 alignment/map format and SAMtools. *Bioinformatics* 25: 2078-2079.  
622 <https://doi.org/10.1093/bioinformatics/btp352>
- 623 Li, Y., and H. S. Dungey, 2018 Expected benefit of genomic selection over forward  
624 selection in conifer breeding and deployment. PLoS ONE 13: e0208232.  
625 <https://doi.org/10.1371/journal.pone.0208232>

- 626 Lorenz, A. J., S. M. Chao, F. G. Asoro, E. L. Heffner, T. Hayashi *et al.*, 2011 Genomic  
627 selection in plant breeding: knowledge and prospects, pp. 77-123 *Adv. Agron* 110:  
628 77–123. <https://doi.org/10.1016/B978-0-12-385531-2.00002-5>
- 629 Mátyás, C., L. Ackzell, and C. Samuel, 2004 *EUFORGEN* technical guidelines for genetic  
630 conservation and use for Scots pine (*Pinus sylvestris*). International Plant Genetic  
631 Resources Institute, Rome, Italy.
- 632 Meuwissen, T. H. E., B. J. Hayes, and M. E. Goddard, 2001 Prediction of total genetic  
633 value using genome-wide dense marker maps. *Genetics* 157.4: 1819-1829
- 634 Meuwissen, T. H. E., B. J. Hayes, and M. E. Goddard, 2016 Genomic selection: a paradigm  
635 shift in animal breeding. *Anim. Front.* 6: 6-14. [https://doi.org/10.2527/af.2016-](https://doi.org/10.2527/af.2016-0002)  
636 0002
- 637 Money, D., K. Gardner, Z. Migicovsky, H. Schwaninger, G. Y. Zhong *et al.*, 2015  
638 LinkImpute: fast and accurate genotype imputation for nonmodel organisms.  
639 *G3(Bethesda)* 5: 2383-2390. <https://doi.org/10.1534/g3.115.021667>
- 640 Narasimhan, V., P. Danecek, A. Scally, Y. Xue, C. Tyler-Smith *et al.*, 2016 BCFtools/RoH:  
641 a hidden Markov model approach for detecting autozygosity from next-generation  
642 sequencing data. *Bioinformatics* 32: 1749-1751. [https://doi.org/10.1093/](https://doi.org/10.1093/bioinformatics/btw044)  
643 [bioinformatics/btw044](https://doi.org/10.1093/bioinformatics/btw044).
- 644 Neale, D. B., and A. Kremer, 2011 Forest tree genomics: growing resources and  
645 applications. *Nat. Rev. Genet.* 12 (2):111-122. <https://doi.org/10.1038/nrg2931>

- 646 Pan, J., B. Wang, Z. Y. Pei, W. Zhao, J. Gao *et al.*, 2015 Optimization of the genotyping-  
647 by-sequencing strategy for population genomic analysis in conifers. *Mol. Ecol.*  
648 *Resour.* 15 (4):711-722. <https://doi.org/10.1111/1755-0998.12342>
- 649 Park, T., and G. Casella, 2008 The Bayesian Lasso. *J. Am. Stat. Assoc.* 103 (482): 681-  
650 686. <https://doi.org/10.1198/016214508000000337>
- 651 Perez, P., and G. de los Campos, 2014 Genome-wide regression and prediction with the  
652 BGLR statistical package. *Genetics* 198 (2): 483-495.  
653 <https://doi.org/10.1534/genetics.114.164442>
- 654 Perez, P., G. de los Campos, J. Crossa, and D. Gianola, 2010 Genomic-enabled prediction  
655 based on molecular markers and pedigree using the Bayesian linear regression  
656 package in R. *Plant Gen.* 3: 106-116.  
657 <https://doi.org/10.3835/plantgenome2010.04.0005>
- 658 Poland, J., J. Endelman, J. Dawson, J. Rutkoski, S. Y. Wu *et al.*, 2012 Genomic selection  
659 in wheat breeding using genotyping-by-sequencing. *Plant Gen.* 5: 103-113.  
660 <https://doi.org/10.3835/plantgenome2012.06.0006>
- 661 R Core Team, 2016: R: A language and environment for statistical computing.
- 662 Ratcliffe, B., O. G. El-Dien, J. Klapste, I. Porth, C. Chen *et al.*, 2015 A comparison of  
663 genomic selection models across time in interior spruce (*Picea engelmannii* x  
664 *glauca*) using unordered SNP imputation methods. *Heredity* 115: 547-555.  
665 <https://doi.org/10.1038/hdy.2015.57>

- 666 Resende, M. F. R., P. Munoz, J. J. Acosta, G. F. Peter, J. M. Davis *et al.*, 2012a  
667 Accelerating the domestication of trees using genomic selection: accuracy of  
668 prediction models across ages and environments. *New Phytol.* 193: 617-624.  
669 <https://doi.org/10.1111/j.1469-8137.2011.03895.x>
- 670 Resende, M. F. R., P. Munoz, M. D. V. Resende, D. J. Garrick, R. L. Fernando *et al.*, 2012b  
671 Accuracy of genomic selection methods in a standard data set of loblolly pine  
672 (*Pinus taeda* L.). *Genetics* 190: 1503-1510.  
673 <https://doi.org/10.1534/genetics.111.137026>
- 674 Rosvall, O., and T. J. Mullin, 2013 Introduction to breeding strategies and evaluation of  
675 alternatives, pp 49-64 in: *Best Practice for Tree Breeding in Europe*, edited by T.  
676 J. Mullin and S. J. Lee. Skogforsk, Uppsala, Sweden.
- 677 Rosvall, O., P. Ståhl, C. Almqvist, B. Anderson, M. Berlin, *et al.*, 2011 Review of the  
678 Swedish tree breeding programme. Skogforsk Internal Report.
- 679 Suontama, M., J. Klápště, E. Telfer, N. Graham, T. Stovold *et al.*, 2018 Efficiency of  
680 genomic prediction across two *Eucalyptus nitens* seed orchards with different  
681 selection histories. *Heredity* 122: 370. <https://doi.org/10.1038/s41437-018-0119-5>
- 682 Tan, B. , D. Grattapaglia, G. S. Martins, K. Z. Ferreira, B. Sundberg *et al.*, 2017 Evaluating  
683 the accuracy of genomic prediction of growth and wood traits in two *Eucalyptus*  
684 species and their F1 hybrids. *BMC Plant Biol.* 17: 110.  
685 <https://doi.org/10.1186/s12870-017-1059-6>

- 686 Thistlethwaite, F. R., B. Ratcliffe, J. Klapste, I. Porth, C. Chen *et al.*, 2017 Genomic  
687 prediction accuracies in space and time for height and wood density of Douglas-fir  
688 using exome capture as the genotyping platform. *BMC Genomics* 18: 930.  
689 <https://doi.org/10.1186/s12864-017-4258-5>
- 690 Troyanskaya, O., M. Cantor, G. Sherlock, P. Brown, T. Hastie *et al.*, 2001 Missing value  
691 estimation methods for DNA microarrays. *Bioinformatics* 17: 520-525.  
692 <https://doi.org/10.1093/bioinformatics/17.6.520>
- 693 VanRaden, P.M., 2008 Efficient methods to compute genomic predictions. *J. Dairy Sci.*  
694 91: 4414-4423. <https://doi.org/10.3168/jds.2007-0980>
- 695 Wegrzyn, J. L., J. D. Liechty, K.A. Stevens, L. S. Wu, C. A. Loopstra *et al.*, 2014 Unique  
696 features of the loblolly pine (*Pinus taeda* L.) megagenome revealed through  
697 sequence annotation. *Genetics* 196: 891-909.  
698 <https://doi.org/10.1534/genetics.113.159996>
- 699 Wimmer, V., T. Albrecht, H. J. Auinger, and C. C. Schon, 2012 Synbreed: a framework  
700 for the analysis of genomic prediction data using R. *Bioinformatics* 28: 2086-2087.  
701 <https://doi.org/10.1093/bioinformatics/bts335>

702 Table 1. Predictive ability (PA) and prediction accuracy (Accuracy) of each model and trait,  $\pm$  standard errors.

| Model     | Type     | Traits           |                  |                  |                 |                  |                 |                 |                 |
|-----------|----------|------------------|------------------|------------------|-----------------|------------------|-----------------|-----------------|-----------------|
|           |          | Ht1              | Ht2              | DBH1             | DBH2            | MFA              | MOEs            | DEN             | MOEd            |
| ABLUP     | PA       | 0.20 $\pm$ 0.01  | 0.38 $\pm$ 0.000 | 0.26 $\pm$ 0.003 | 0.23 $\pm$ 0.01 | 0.30 $\pm$ 0.001 | 0.39 $\pm$ 0.01 | 0.41 $\pm$ 0.01 | 0.44 $\pm$ 0.02 |
|           | Accuracy | 0.83 $\pm$ 0.01  | 0.81 $\pm$ 0.000 | 0.83 $\pm$ 0.003 | 0.84 $\pm$ 0.01 | 0.83 $\pm$ 0.001 | 0.75 $\pm$ 0.01 | 0.81 $\pm$ 0.01 | 0.82 $\pm$ 0.01 |
| GBLUP-EM  | PA       | 0.20 $\pm$ 0.01  | 0.39 $\pm$ 0.001 | 0.26 $\pm$ 0.002 | 0.26 $\pm$ 0.01 | 0.29 $\pm$ 0.002 | 0.39 $\pm$ 0.01 | 0.40 $\pm$ 0.01 | 0.41 $\pm$ 0.02 |
|           | Accuracy | 0.69 $\pm$ 0.02  | 0.75 $\pm$ 0.002 | 0.73 $\pm$ 0.001 | 0.74 $\pm$ 0.01 | 0.73 $\pm$ 0.003 | 0.69 $\pm$ 0.01 | 0.73 $\pm$ 0.01 | 0.74 $\pm$ 0.01 |
| GBLUP-RND | PA       | 0.19 $\pm$ 0.003 | 0.38 $\pm$ 0.000 | 0.25 $\pm$ 0.000 | 0.25 $\pm$ 0.01 | 0.28 $\pm$ 0.002 | 0.37 $\pm$ 0.02 | 0.38 $\pm$ 0.02 | 0.40 $\pm$ 0.02 |
|           | Accuracy | 0.67 $\pm$ 0.004 | 0.74 $\pm$ 0.002 | 0.71 $\pm$ 0.002 | 0.72 $\pm$ 0.01 | 0.71 $\pm$ 0.003 | 0.67 $\pm$ 0.02 | 0.71 $\pm$ 0.01 | 0.72 $\pm$ 0.01 |
| BL-EM     | PA       | 0.15 $\pm$ 0.04  | 0.39 $\pm$ 0.02  | 0.22 $\pm$ 0.02  | 0.30 $\pm$ 0.04 | 0.33 $\pm$ 0.03  | 0.36 $\pm$ 0.03 | 0.32 $\pm$ 0.02 | 0.40 $\pm$ 0.03 |
|           | Accuracy | 0.66 $\pm$ 0.03  | 0.74 $\pm$ 0.01  | 0.70 $\pm$ 0.02  | 0.75 $\pm$ 0.02 | 0.76 $\pm$ 0.02  | 0.67 $\pm$ 0.02 | 0.69 $\pm$ 0.01 | 0.71 $\pm$ 0.02 |
| BL-RND    | PA       | 0.26 $\pm$ 0.03  | 0.36 $\pm$ 0.04  | 0.26 $\pm$ 0.02  | 0.26 $\pm$ 0.02 | 0.28 $\pm$ 0.05  | 0.34 $\pm$ 0.03 | 0.40 $\pm$ 0.02 | 0.41 $\pm$ 0.03 |
|           | Accuracy | 0.69 $\pm$ 0.02  | 0.73 $\pm$ 0.02  | 0.71 $\pm$ 0.01  | 0.72 $\pm$ 0.01 | 0.68 $\pm$ 0.03  | 0.65 $\pm$ 0.02 | 0.71 $\pm$ 0.01 | 0.72 $\pm$ 0.02 |
| BRR-EM    | PA       | 0.18 $\pm$ 0.04  | 0.41 $\pm$ 0.03  | 0.25 $\pm$ 0.05  | 0.27 $\pm$ 0.03 | 0.33 $\pm$ 0.04  | 0.42 $\pm$ 0.03 | 0.40 $\pm$ 0.03 | 0.46 $\pm$ 0.02 |
|           | Accuracy | 0.65 $\pm$ 0.03  | 0.77 $\pm$ 0.02  | 0.72 $\pm$ 0.01  | 0.75 $\pm$ 0.01 | 0.73 $\pm$ 0.03  | 0.70 $\pm$ 0.02 | 0.72 $\pm$ 0.02 | 0.76 $\pm$ 0.01 |
| BRR-RND   | PA       | 0.24 $\pm$ 0.02  | 0.39 $\pm$ 0.03  | 0.21 $\pm$ 0.02  | 0.24 $\pm$ 0.03 | 0.27 $\pm$ 0.03  | 0.40 $\pm$ 0.04 | 0.40 $\pm$ 0.03 | 0.45 $\pm$ 0.04 |
|           | Accuracy | 0.72 $\pm$ 0.02  | 0.75 $\pm$ 0.02  | 0.70 $\pm$ 0.02  | 0.74 $\pm$ 0.01 | 0.73 $\pm$ 0.02  | 0.68 $\pm$ 0.02 | 0.72 $\pm$ 0.01 | 0.75 $\pm$ 0.02 |

703 EM and RND denote expectation maximization and random imputation methods, respectively. ABLUP and GBLUP denote pedigree  
704 and genomic best linear unbiased predictions, respectively whereas BRR and BL denote Bayesian ridge regression and Bayesian lasso  
705 respectively.



706 Table 2. Additive genetic variance ( $\sigma_a^2$ ) residual variance ( $\sigma_e^2$ ) and heritability with  
 707 standard error ( $h^2 \pm SE$ ) from ABLUP and GBLUP models.

| Trait | IM | Method    | $\sigma_a^2$ | $\sigma_e^2$ | $h^2 \pm SE$    |
|-------|----|-----------|--------------|--------------|-----------------|
| Ht1   | .  | ABLUP     | 331.3        | 1445.9       | $0.19 \pm 0.06$ |
|       |    | EM GBLUP  | 294.6        | 1504.6       | $0.16 \pm 0.06$ |
|       |    | RND GBLUP | 305.2        | 1484.3       | $0.17 \pm 0.06$ |
| Ht2   | .  | ABLUP     | 3827.5       | 5810.3       | $0.40 \pm 0.09$ |
|       |    | EM GBLUP  | 3539.0       | 6170.3       | $0.37 \pm 0.08$ |
|       |    | RND GBLUP | 3437.0       | 6075.4       | $0.36 \pm 0.08$ |
| DBH1  | .  | ABLUP     | 147.2        | 460.6        | $0.24 \pm 0.07$ |
|       |    | EM GBLUP  | 144.7        | 473.4        | $0.23 \pm 0.07$ |
|       |    | RND GBLUP | 133.6        | 475.4        | $0.22 \pm 0.07$ |
| DBH2  | .  | ABLUP     | 158.8        | 628.7        | $0.20 \pm 0.07$ |
|       |    | EM GBLUP  | 173.4        | 625.6        | $0.22 \pm 0.07$ |
|       |    | RND GBLUP | 164.4        | 624.2        | $0.21 \pm 0.06$ |
| MFA   | .  | ABLUP     | 4.8          | 12.4         | $0.28 \pm 0.08$ |
|       |    | EM GBLUP  | 4.3          | 13.3         | $0.24 \pm 0.07$ |
|       |    | RND GBLUP | 4.0          | 13.3         | $0.23 \pm 0.07$ |
| MOEs  | .  | ABLUP     | 1.3          | 2.0          | $0.39 \pm 0.10$ |
|       |    | EM GBLUP  | 1.4          | 2.1          | $0.39 \pm 0.09$ |
|       |    | RND GBLUP | 1.2          | 2.2          | $0.35 \pm 0.08$ |
| DEN   | .  | ABLUP     | 419.0        | 543.9        | $0.44 \pm 0.10$ |
|       |    | EM GBLUP  | 402.9        | 593.3        | $0.40 \pm 0.08$ |
|       |    | RND GBLUP | 367.7        | 595.6        | $0.38 \pm 0.08$ |
| MOEd  | .  | ABLUP     | 0.8          | 1.0          | $0.46 \pm 0.10$ |
|       |    | EM GBLUP  | 0.7          | 1.1          | $0.38 \pm 0.08$ |
|       |    | RND GBLUP | 0.7          | 1.1          | $0.39 \pm 0.08$ |

708 IM: imputation method. EM and RND denote expectation maximization and random  
 709 imputations, respectively.

710 Table 3. Relative efficiency (RE) and relative efficiency per year (RE/year) of genomic  
 711 prediction models compared to ABLUP from cross validated models and for each trait.

| Trait | RE    |      |      | RE <sup>a</sup> /year |      |      | RE <sup>b</sup> /year |      |      |
|-------|-------|------|------|-----------------------|------|------|-----------------------|------|------|
|       | GBLUP | BRR  | BL   | GBLUP                 | BRR  | BL   | GBLUP                 | BRR  | BL   |
| Ht1   | 0.83  | 0.78 | 0.80 | 1.66                  | 1.57 | 1.59 | 1.59                  | 1.50 | 1.52 |
| Ht2   | 0.93  | 0.95 | 0.91 | 1.85                  | 1.90 | 1.83 | 1.77                  | 1.81 | 1.74 |
| DBH1  | 0.88  | 0.87 | 0.84 | 1.76                  | 1.73 | 1.69 | 1.68                  | 1.66 | 1.61 |
| DBH2  | 0.88  | 0.89 | 0.89 | 1.76                  | 1.79 | 1.79 | 1.68                  | 1.70 | 1.70 |
| MFA   | 0.88  | 0.88 | 0.92 | 1.76                  | 1.76 | 1.83 | 1.68                  | 1.68 | 1.75 |
| MOEs  | 0.92  | 0.93 | 0.89 | 1.84                  | 1.87 | 1.79 | 1.76                  | 1.78 | 1.71 |
| DEN   | 0.90  | 0.89 | 0.85 | 1.80                  | 1.78 | 1.70 | 1.72                  | 1.70 | 1.63 |
| MOEd  | 0.90  | 0.93 | 0.87 | 1.80                  | 1.85 | 1.73 | 1.72                  | 1.77 | 1.65 |

712 <sup>a</sup> and <sup>b</sup> represent first and second group of selection strategies from the Swedish Scots  
 713 pine breeding cycle, respectively.

714 GBLUP, BRR and BL estimates are based on the EM imputation algorithm.

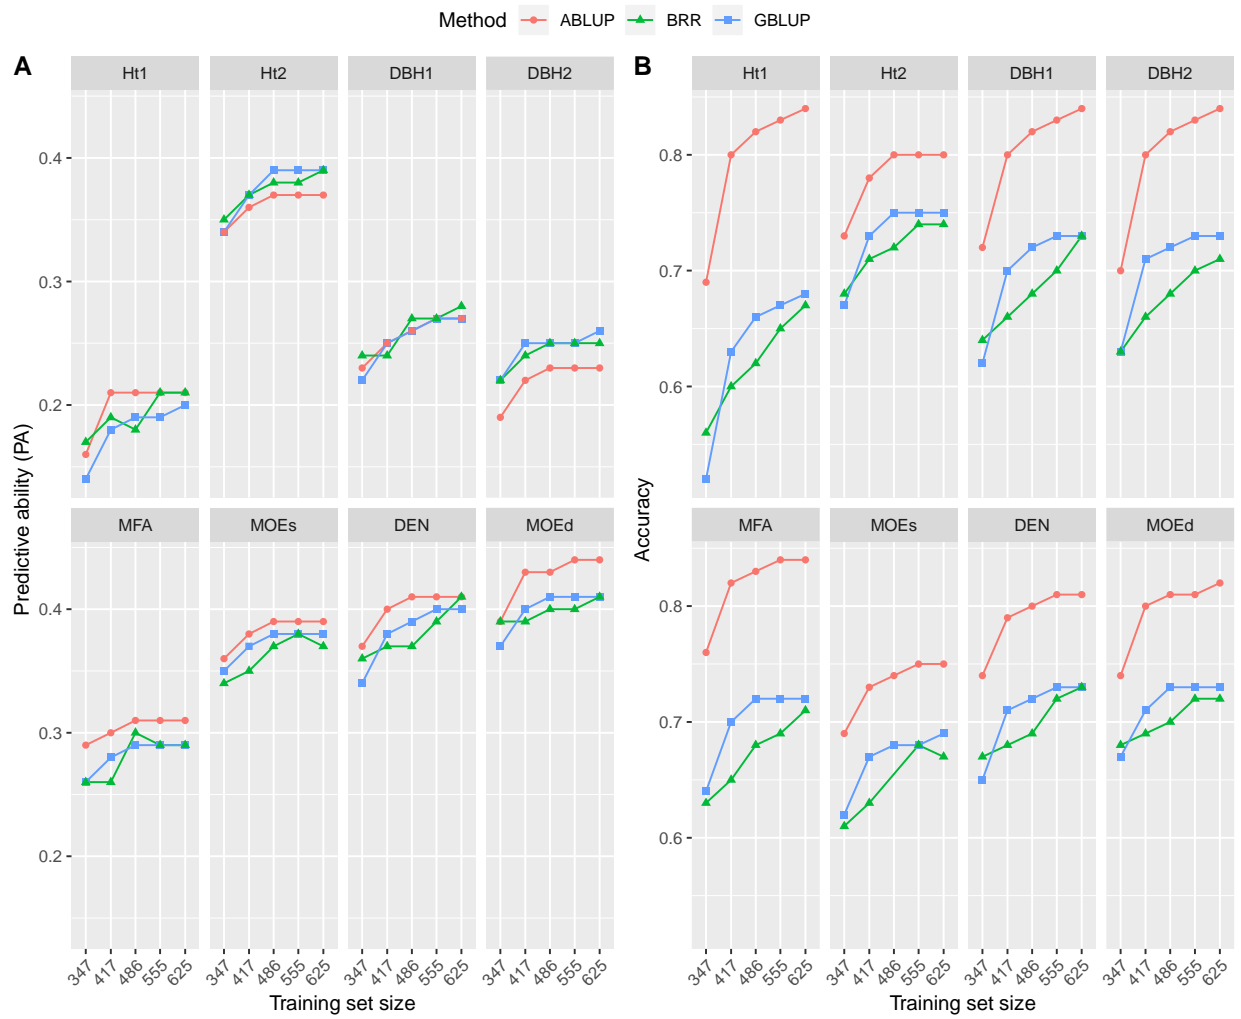

715

716 Fig.1. A) Predictive ability (PA) and B) prediction accuracy (Accuracy) of the genomic  
 717 prediction models for different sizes of training and validation sets.

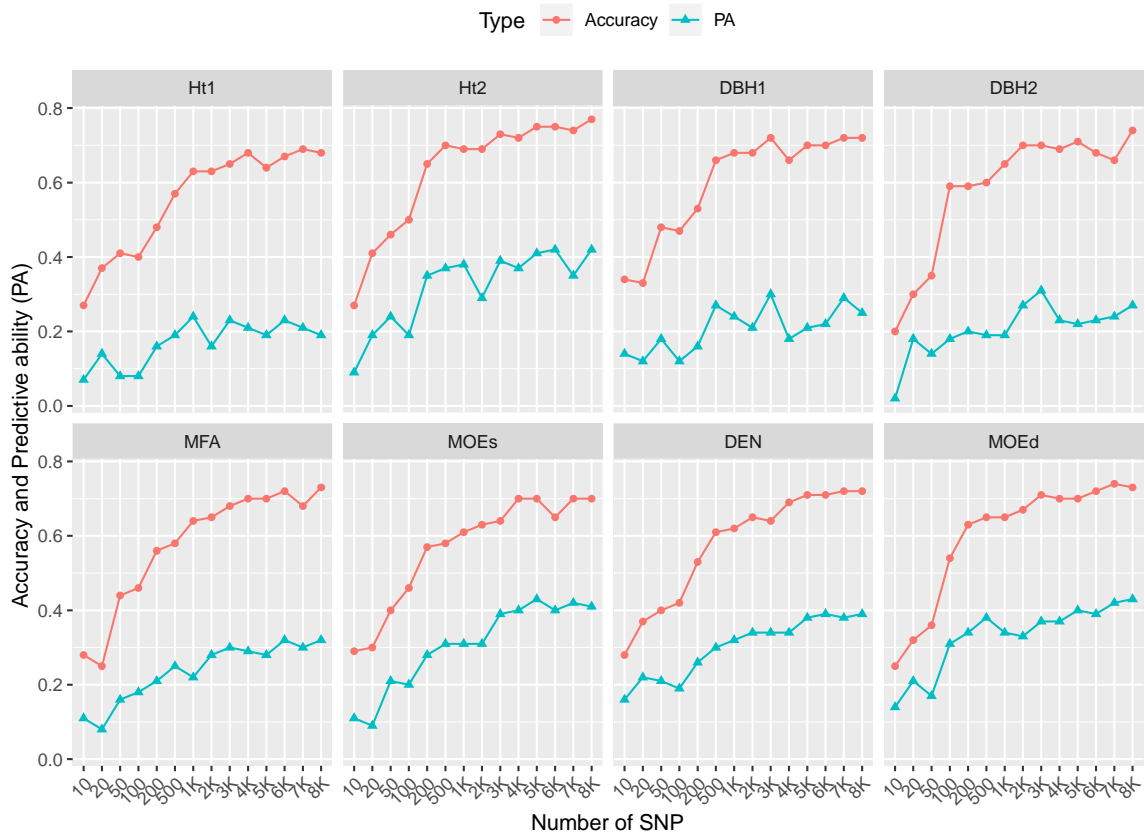

718

719 Fig. 1. Prediction accuracy (Accuracy) and predictive ability (PA) of Bayesian Ridge  
 720 Regression prediction model for 14 different subsets of SNPs (10, 20, 50, 100, 200, 500,  
 721 1000, 2000, 3000, 4000, 5000, 6000, 7000 and 8719 SNPs).

722

723

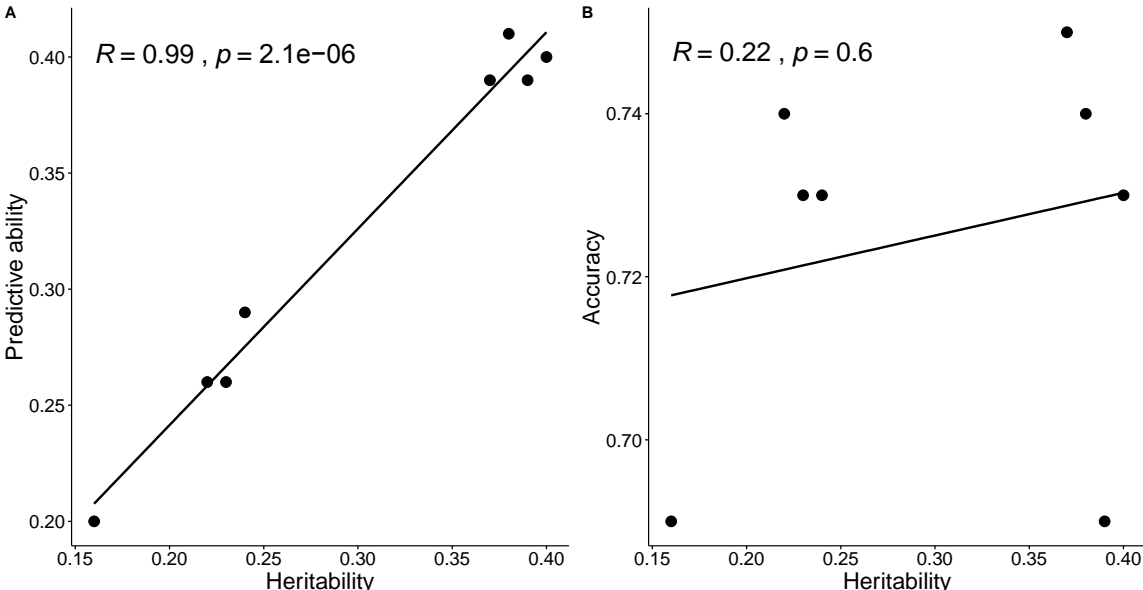

724

725 Fig. 2. A) Regression between Predictive ability and trait heritabilities. B) Regression  
726 between predictive accuracy (Accuracy) and trait heritabilities. Trait heritabilities were  
727 estimated with GBLUP-EM model.

728
